# Supplementary material for: Growth Response and Differentiation of Bone Marrow-Derived Mesenchymal Stem/Stromal Cells in the Presence of Novel Multiple Myeloma Drug Melflufen
Source: MDPI journal article supplement (doi:10.3390/cells11091574), 2022-05-07
Supplement: s1 [file s1]

## Supplementary data

Table S1: BMSC donor information marker expression.

| Donor ID   | 1    | 2      | 3      | 4    | 5    | 6 | 7 | 8      |
|------------|------|--------|--------|------|------|---|---|--------|
| <b>Sex</b> | Male | Female | Female | Male | Male | - | - | Female |
| <b>Age</b> | 90   | 87     | 91     | 92   | 82   | - | - | 56     |
| <b>BMI</b> | 24.2 | 28.9   | 23.4   | 19.0 | 25.6 | - | - | 48.4   |

- donor information unknown

Table S2: BMSC surface marker expression.

| Donor          | 1       | 2       | 3      | 4      | 5      | 6       | 7       | 8       |
|----------------|---------|---------|--------|--------|--------|---------|---------|---------|
| <b>Passage</b> | 2       | 2       | 3      | 3      | 3      | 3       | 2       | 3       |
| <b>CD14</b>    | 1.2 %   | 2.1 %   | 7.4 %  | 4.1 %  | 5.2 %  | 2.6 %   | 3.4 %   | 1.7 %   |
| <b>CD19</b>    | 1.2 %   | 2.4 %   | 7.1 %  | 2.5 %  | 2.0 %  | 1.1 %   | 5.3 %   | 1.6 %   |
| <b>CD34</b>    | 0.8 %   | 0.5 %   | 3.1 %  | 2.1 %  | 1.0 %  | 0.4 %   | 1.4 %   | 1.5 %   |
| <b>CD45</b>    | 1.6 %   | 1.0 %   | 8.8 %  | 6.2 %  | 3.5 %  | 0.9 %   | 2.7 %   | 2.4 %   |
| <b>CD73</b>    | 100.0 % | 100.0 % | 95.4 % | 95.6 % | 95.6 % | 100.0 % | 100.0 % | 100.0 % |
| <b>CD90</b>    | 98.0 %  | 89.4 %  | 90.2 % | 94.2 % | 86.6 % | 88.0 %  | 97.6 %  | 99.8 %  |
| <b>CD105</b>   | 100.0 % | 99.9 %  | 93.6 % | 98.7 % | 97.2 % | 100.0 % | 100.0 % | 99.9 %  |
| <b>HLA-DR</b>  | 97.1 %  | 88.7 %  | 92.2 % | 88.6 % | 96.8 % | 95.7 %  | 72.0 %  | 96.0 %  |

Table S3: Antibodies used in immunocytochemical staining.

| <i>Osteogenically differentiated BMSCs</i> |                                                            |                     |                    |                 |
|--------------------------------------------|------------------------------------------------------------|---------------------|--------------------|-----------------|
| <b>Type</b>                                | <b>Antibody</b>                                            | <b>Host species</b> | <b>Clone</b>       | <b>Dilution</b> |
| Primary                                    | Anti-Collagen I (ab260043) <sup>1</sup>                    | Rabbit              | EPR22894-89        | 1:250           |
| Primary                                    | Anti-Osteocalcin (MAB1419) <sup>2</sup>                    | Mouse               | IgG1 Clone #190125 | 1 : 50          |
| Secondary                                  | Anti-rabbit IgG Alexa fluor 488 (A21206) <sup>3</sup>      | Donkey              |                    | 1 : 500         |
| Secondary                                  | Anti-mouse IgG1 Alexa fluor 488 (A21121) <sup>3</sup>      | Goat                |                    | 1 : 500         |
| <i>Angiogenesis assay</i>                  |                                                            |                     |                    |                 |
| <b>Type</b>                                | <b>Antibody</b>                                            | <b>Host species</b> | <b>Clone</b>       | <b>Dilution</b> |
| Primary                                    | Anti- $\alpha$ -smooth muscle actin (ab7817) <sup>1</sup>  | Mouse               | 1A4                |                 |
| Secondary                                  | Anti-mouse IgG (H+L) Alexa Fluor 568 (A11031) <sup>3</sup> | Goat                |                    | 1:500           |

1 Abcam, Cambridge, United Kingdom. 2 R&D systems, Minneapolis, MN, US. 4 Sigma-Aldrich., 3 Thermo Fisher Scientific

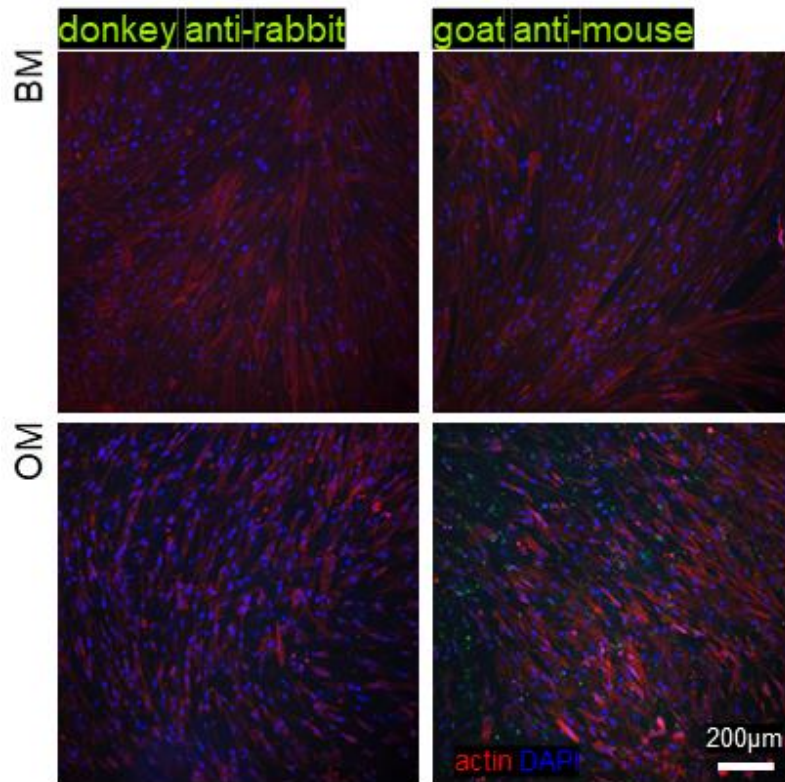

Figure S1: Secondary antibody control images showing an insignificant amount of background staining by the secondary antibodies in absence of any primary antibody. BM = basic medium, OM = osteogenic medium. Scale bar: 200µm.

Table S4: Primer sequences for qRT-PCR.

| <b>Gene</b>   | <b>Accession number</b> | <b>5'-Sequence-3'</b>                                            | <b>Product size (bp)</b> |
|---------------|-------------------------|------------------------------------------------------------------|--------------------------|
| <i>DLX5</i>   | NM_005221.5             | Forward ACCATCCGTCTCAGGAATCG<br>Reverse CCCCCGTAGGGCTGTAGTAGT    | 75                       |
| <i>FABP4</i>  | NM_001442               | Forward GGTGGTGGGAATGCGTCATG<br>Reverse CAACGTCCCTTGGCTTATGC     | 71                       |
| <i>LEP</i>    | NM_000230               | Forward ACAATTGTCACCAGGATCAATGAC<br>Reverse TCCAAACCGGTGACTTTCTG | 73                       |
| <i>RPLP0</i>  | NM_001002               | Forward AATCTCCAGGGGCACCATT<br>Reverse CGCTGGCTCCCACCTTTGT       | 70                       |
| <i>RUNX2A</i> | NM_001024630.3          | Forward CTTCATTCGCCTCACAAACAAC<br>Reverse TCCTCCTGGAGAAAGTTTGCA  | 62                       |
| <i>SP7</i>    | AF477981                | Forward TGAGCTGGAGCGTCATGTG<br>Reverse TCGGGTAAAGCGCTTGGA        | 79                       |

bp: base pair

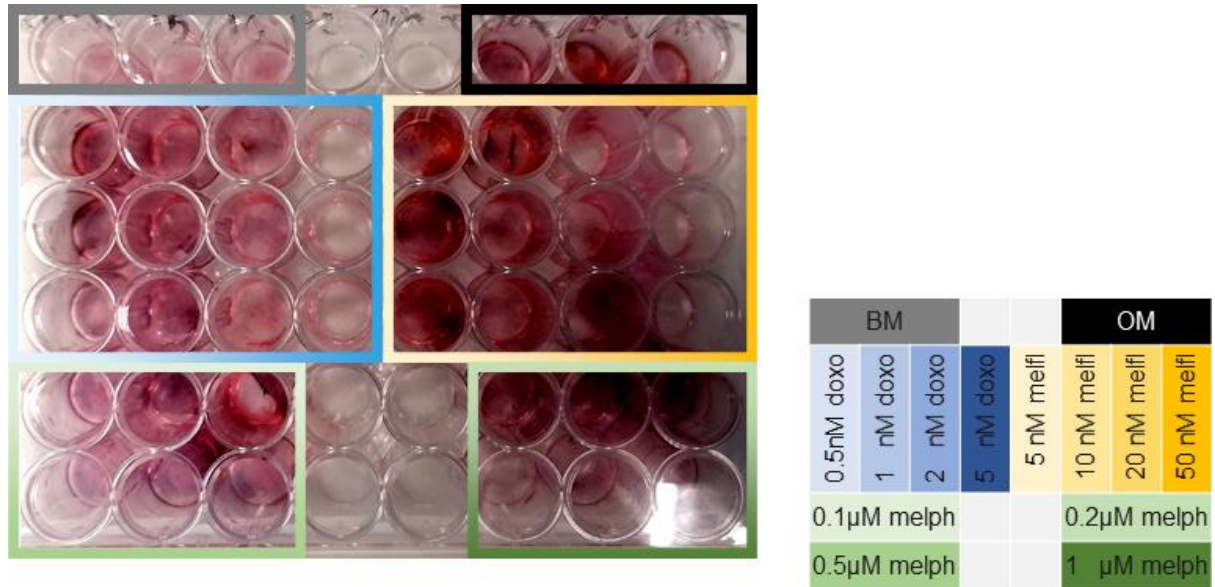

Figure S2: Representative image of Alizarin Red S stainings for the mineralized matrix from a culture well plate with osteogenically differentiated BMSC at 21 days of culture with drugs added at the indicated concentrations. melfl = melflufen, melph = melphalan, doxo = doxorubicin

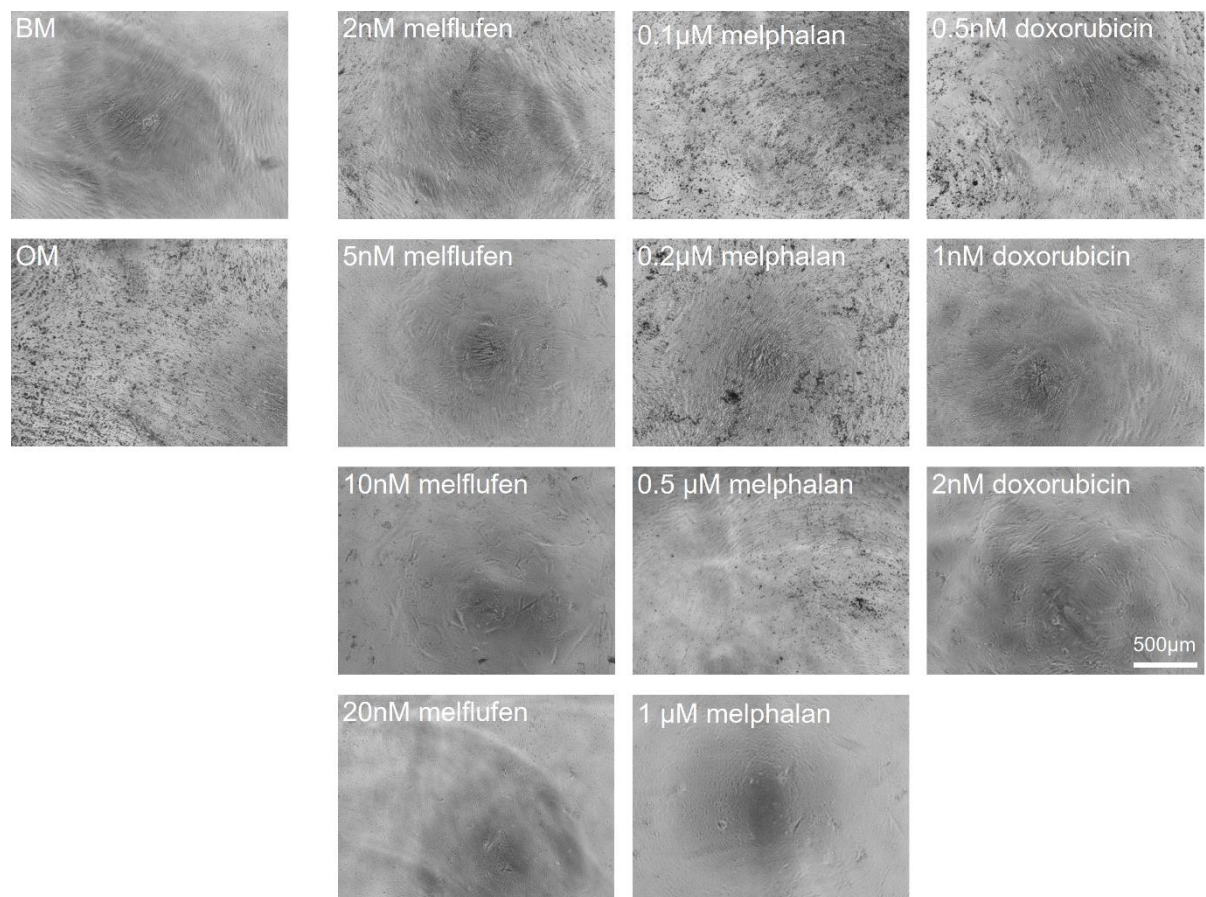

Figure S3: Phase contrast images of osteogenically differentiated BMSCs at 21 days of culture.

BM = basic medium control, OM = osteogenic medium control without drugs. Scale bar:

500μm
